# Supplementary material for: The silencing of the SWI/SNF subunit and anticancer gene BRM in Rhabdoid tumors
Source: PubMed Central journal article supplement (PMC4102812; doi:10.18632/oncotarget.1945), 2014-05-04
Supplement: oncotarget-05-3316-s001.pdf [file oncotarget-05-3316-s001.pdf]

## The silencing of the SWI/SNF subunit and anticancer gene sBRM in Rhabdoid tumors

### Supplementary Material

**Supplementary Table 1:** Table showing the status of BRM polymorphisms (-741/-1321) and BAF47 in Rhabdoid cell lines used in the study. Column 1 listed the name of the 11 Rhabdoid cell lines. Column 2 and 3 listed the status of the two BRM polymorphisms, designated as Poly 741 and Poly 1321, in the BRM promoter. Column 4 shows the defects associated with BAF47 in these cell lines.

| Cell Lines | BRM Polymorphism |           | BAF47                     |
|------------|------------------|-----------|---------------------------|
|            | Poly 741         | Poly 1321 | Defects                   |
| KPMRT-AN   | WT               | HETERO    | Deleted                   |
| KPMRT-YML  | HETERO           | HETERO    | No                        |
| BT-12      | HETERO           | HOMO      | Deleted                   |
| 1240       | HETERO           | HOMO      | G646T (nonsense mutation) |
| KPMRT-NS   | HETERO           | WT        | No                        |
| TM-87      | HOMO             | HETERO    | Deleted                   |
| BT-16      | HOMO             | HOMO      | Deleted                   |
| G401       | HOMO             | HOMO      | Deleted                   |
| KD         | WT               | HOMO      | Deleted (Exon 4 & 5)      |
| LM         | WT               | HOMO      | Deleted                   |
| TTC-642    | WT               | WT        | C118T (nonsense mutation) |

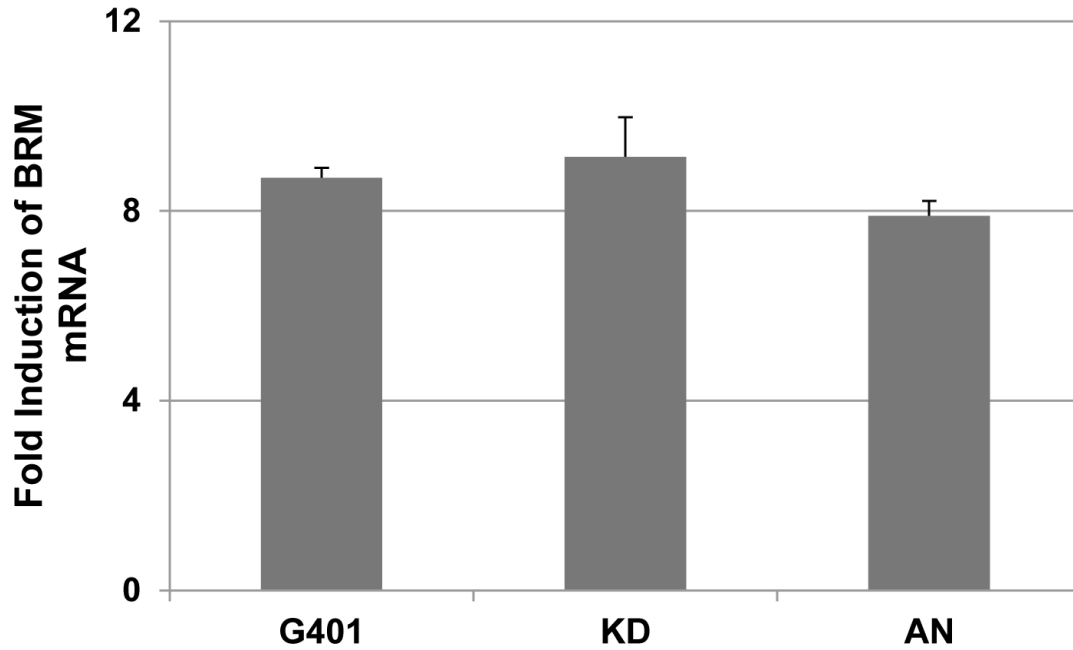

**Supplementary Figure 1** demonstrates induction of BRM mRNA following the treatment of Rhabdoid cell lines, G401, KD and KPMRT-AN with 250nM of Flavopiridol for 48 hours.

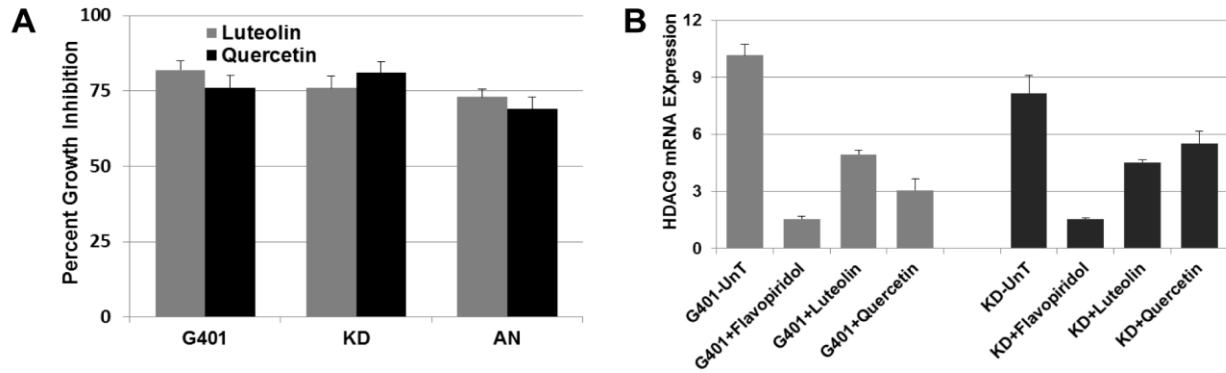

**Supplementary Figure 2: Panel A** demonstrates cellular growth inhibition (80-90%) following the treatment of Rhabdoid cell lines, G401, KD and KPMRT-AN with 3 $\mu$ M of indicated flavonoids over a period of 5 days.

**Panel B** illustrates the inhibition of HDAC9 mRNA ( $p < 0.05$ ) following the treatment of Rhabdoid cell lines, G401 and KD with 250nM of Flavopiridol, 3 $\mu$ M of Luteolin or 3 $\mu$ M of Quercetin. UnT represents the parental control cell lines.

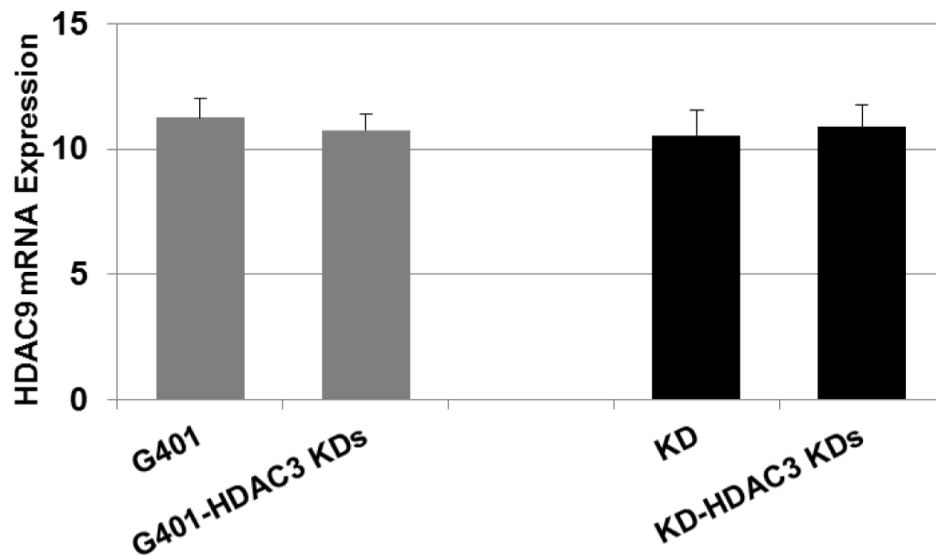

**Supplementary Figure 3** demonstrates the level of HDAC9 mRNA level following the gene-specific shRNA mediated knockdown of HDAC3 in G401 and KD cell lines. No statistically significant changes in the HDAC9 level was observed following HDAC3 knockdown ( $p > 0.05$ )

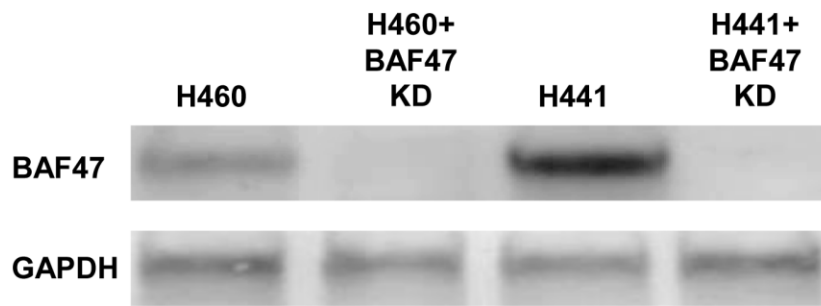

**Supplementary Figure 4A:** Western Blot showing the efficiency of BAF47 knockdown by gene-specific shRNA in H460 and H441 cell lines.

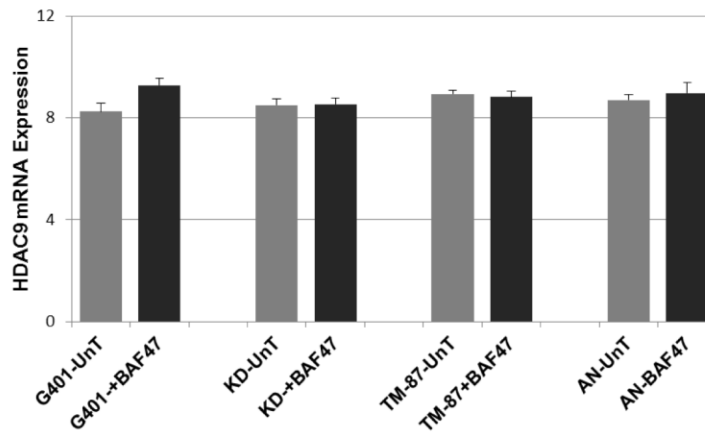

**Supplementary Figure 4B:** demonstrates the level of HDAC9 mRNA level following re-expression of BAF47 in Rhabdoid cell lines, G401, KD, TM-87 and KPMRT-AN. No statistically significant changes in the HDAC9 level was observed following BAF47 expression ( $p > 0.05$ )

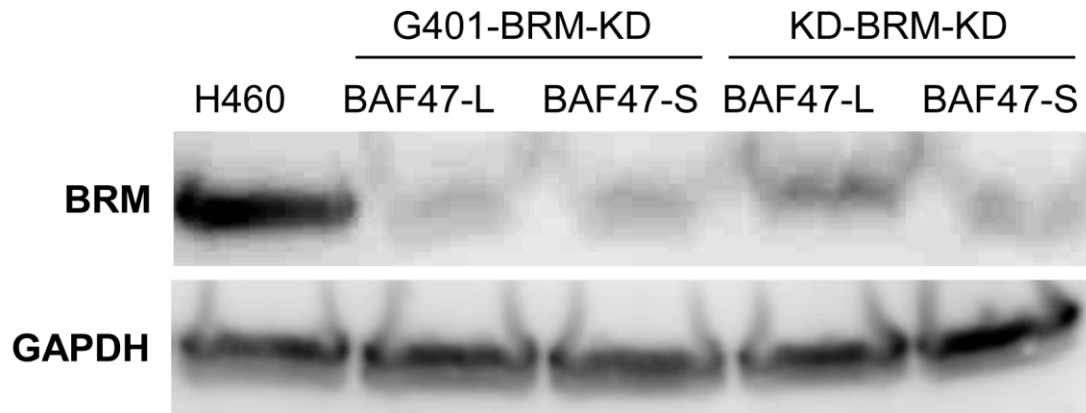

**Supplementary Figure 5:** Demonstrates the level of BRM protein after the transduction of long (BAF47-L)- and short (BAF47-S)-form of BAF47 in G401 and KD cell lines harboring the anti-BRM shRNA. No apparent differences in BRM expression was observed in either of the cell lines following the transduction of long- or short-form of BAF47.

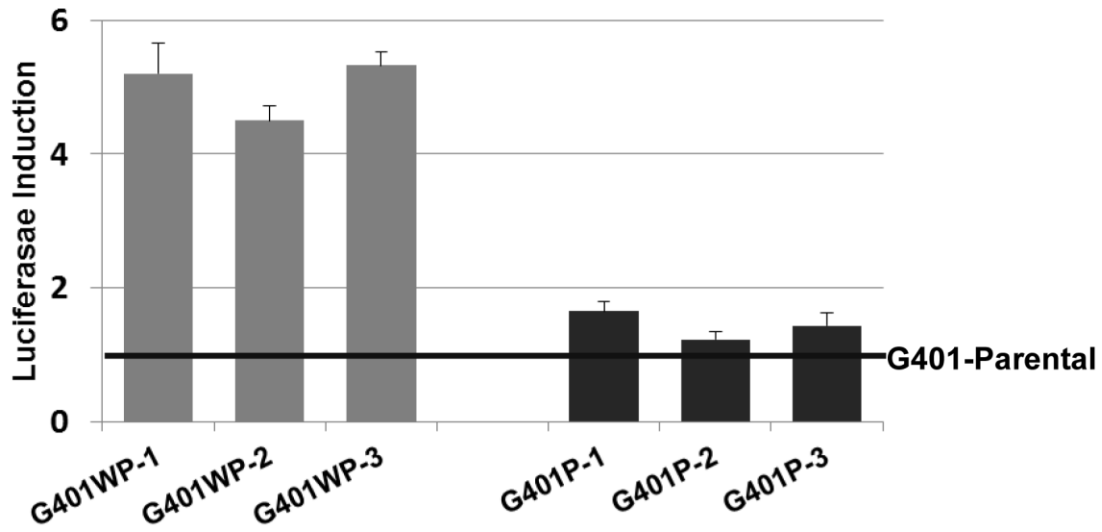

**Supplementary Figure 6:** Graph showing the luciferase output as a measure of BRM-promoter activity in molecularly altered G401 cell lines, G401WP (without BRM polymorphisms, -1321 and -741), and G401P (with BRM polymorphisms, -1321 and -741). The luciferase induction was normalized against G401 parental cell line (taken as 1). The daughter cell lines without the polymorphic sites (G401WP-1, 2 and 3) displayed significantly higher luciferase output ( $p < 0.05$ ) compared G401 cell lines harboring the BRM polymorphisms (G401P-1, 2 and 3).
